# Supplementary material
Source: HighWire-hosted journal article supplement (doi:10.1101/rna.057075.116)
Supplement: Supplemental_Table.docx [file Supplemental_Table.docx]

**Supplementary Tables**

**Table S1. Read statistics**

| **Samples** | **No. of raw reads** | **No. of PASS reads** |
| --- | --- | --- |
| 100 ng HeLa cell total RNA | 17,758,220 | 6,352,086 |
| 200 ng HeLa cell total RNA, batch 1 | 9,801,509 | 2,389,878 |
| 200 ng HeLa cell total RNA, batch 2 | 17,966,592 | 4,764,266 |
| 400 ng HeLa cell total RNA | 19,670,102 | 5,717,973 |
| 1 µg HeLa cell total RNA, batch 1 | 9,400,843 | 2,548,297 |
| 1 µg HeLa cell total RNA, batch 2 | 16,924,095 | 5,753,272 |
| 5 µg HeLa cell total RNA, batch 1 | 13,183,946 | 2,815,806 |
| 5 µg HeLa cell total RNA, batch 2 | 16,636,551 | 5,435,961 |
| 15 µg HeLa cell total RNA | 16,338,443 | 6,126,184 |
